# Supplementary material for: The Atlantic Ocean landscape: A basin-wide cluster analysis of the Atlantic near seafloor environment
Source: Frontiers journal article supplement (doi:10.3389/fmars.2022.936095), 2022-08-15
Supplement: Data_Sheet_1.zip [file Data_Sheet_1.zip]

**Figure F1: Boxplots outlining the SBA characteristics. The boxes comprise the groups’ interquartile ranges, i.e. between the upper (75%) and lower (25%) quartiles and contain the central 50% of the data. The ‘whiskers’ (straight lines below and above the box) denote minimum and maximum data values, and together with the boxes make up 95% of the data set. The remaining 5% are extreme values. The coloured lines/grey dots inside the boxes indicates the groups’ median/mean, whereas the grey dashed line is the overall data set’s median. For better visibility, the plots contain no extreme values. For plots including those, please refer to Figure F2 further down.**


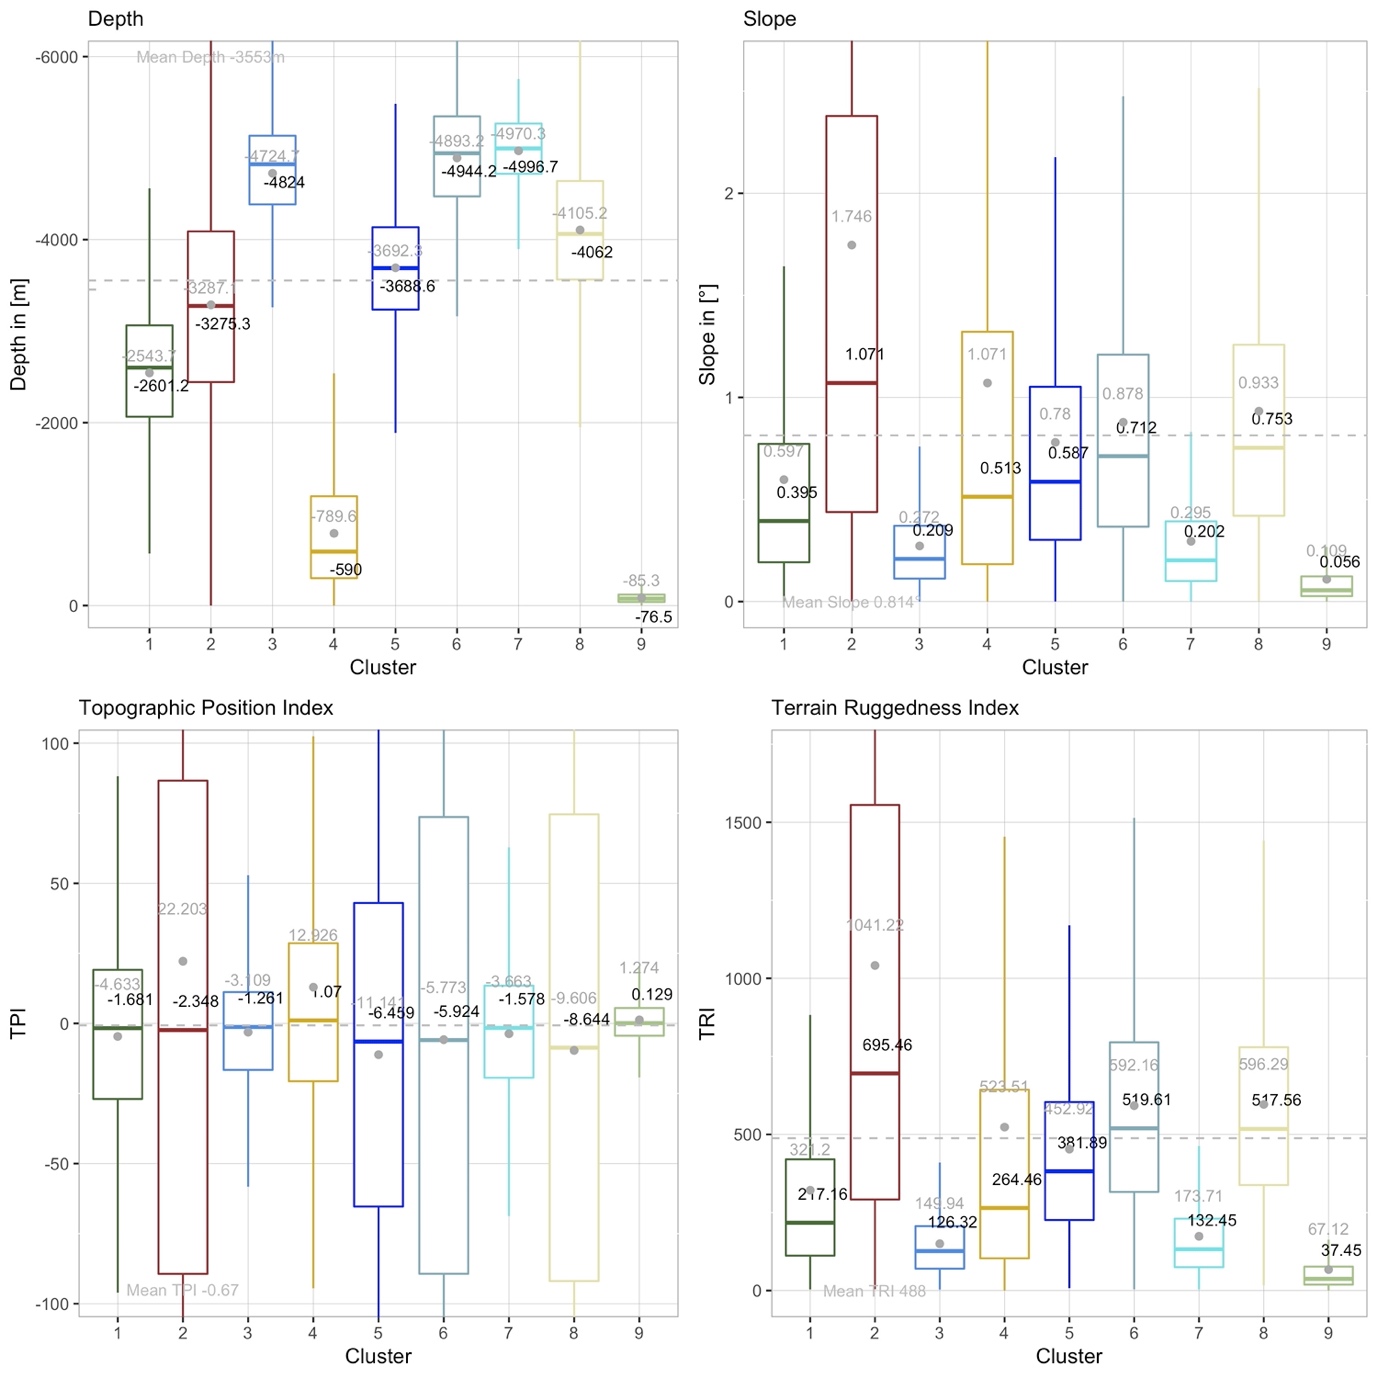

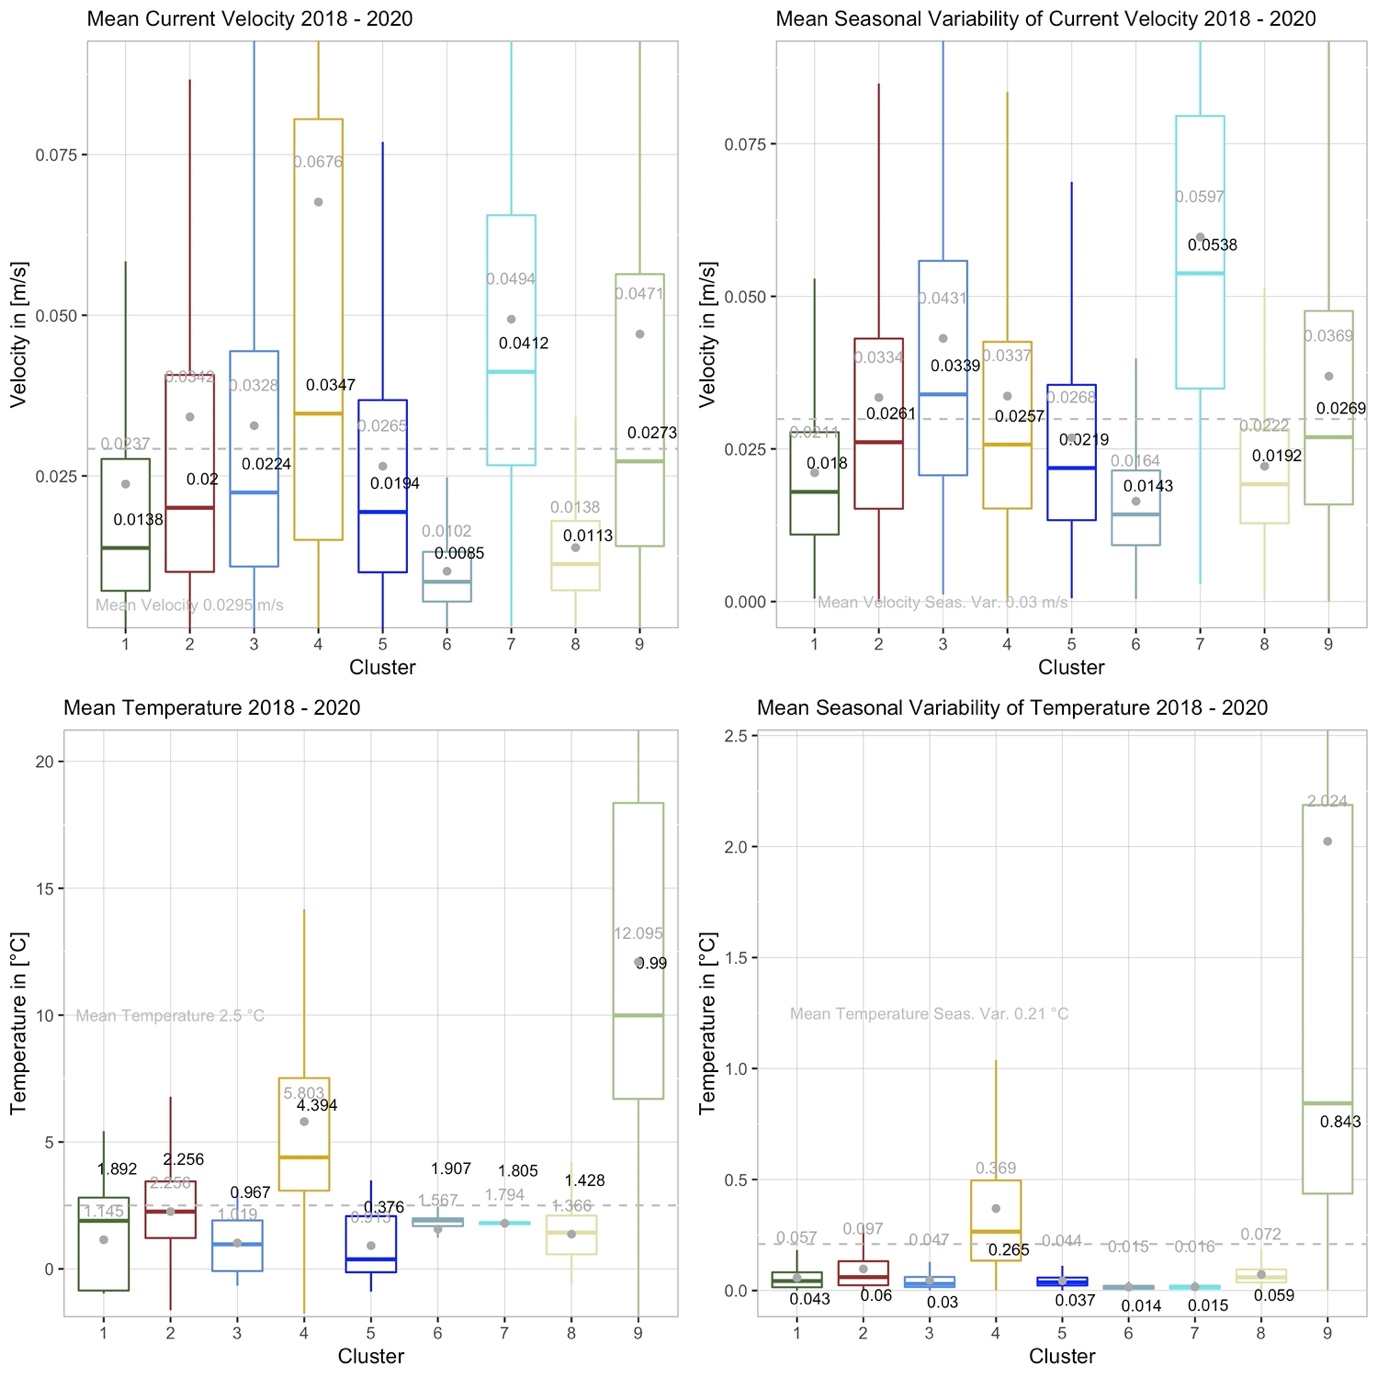

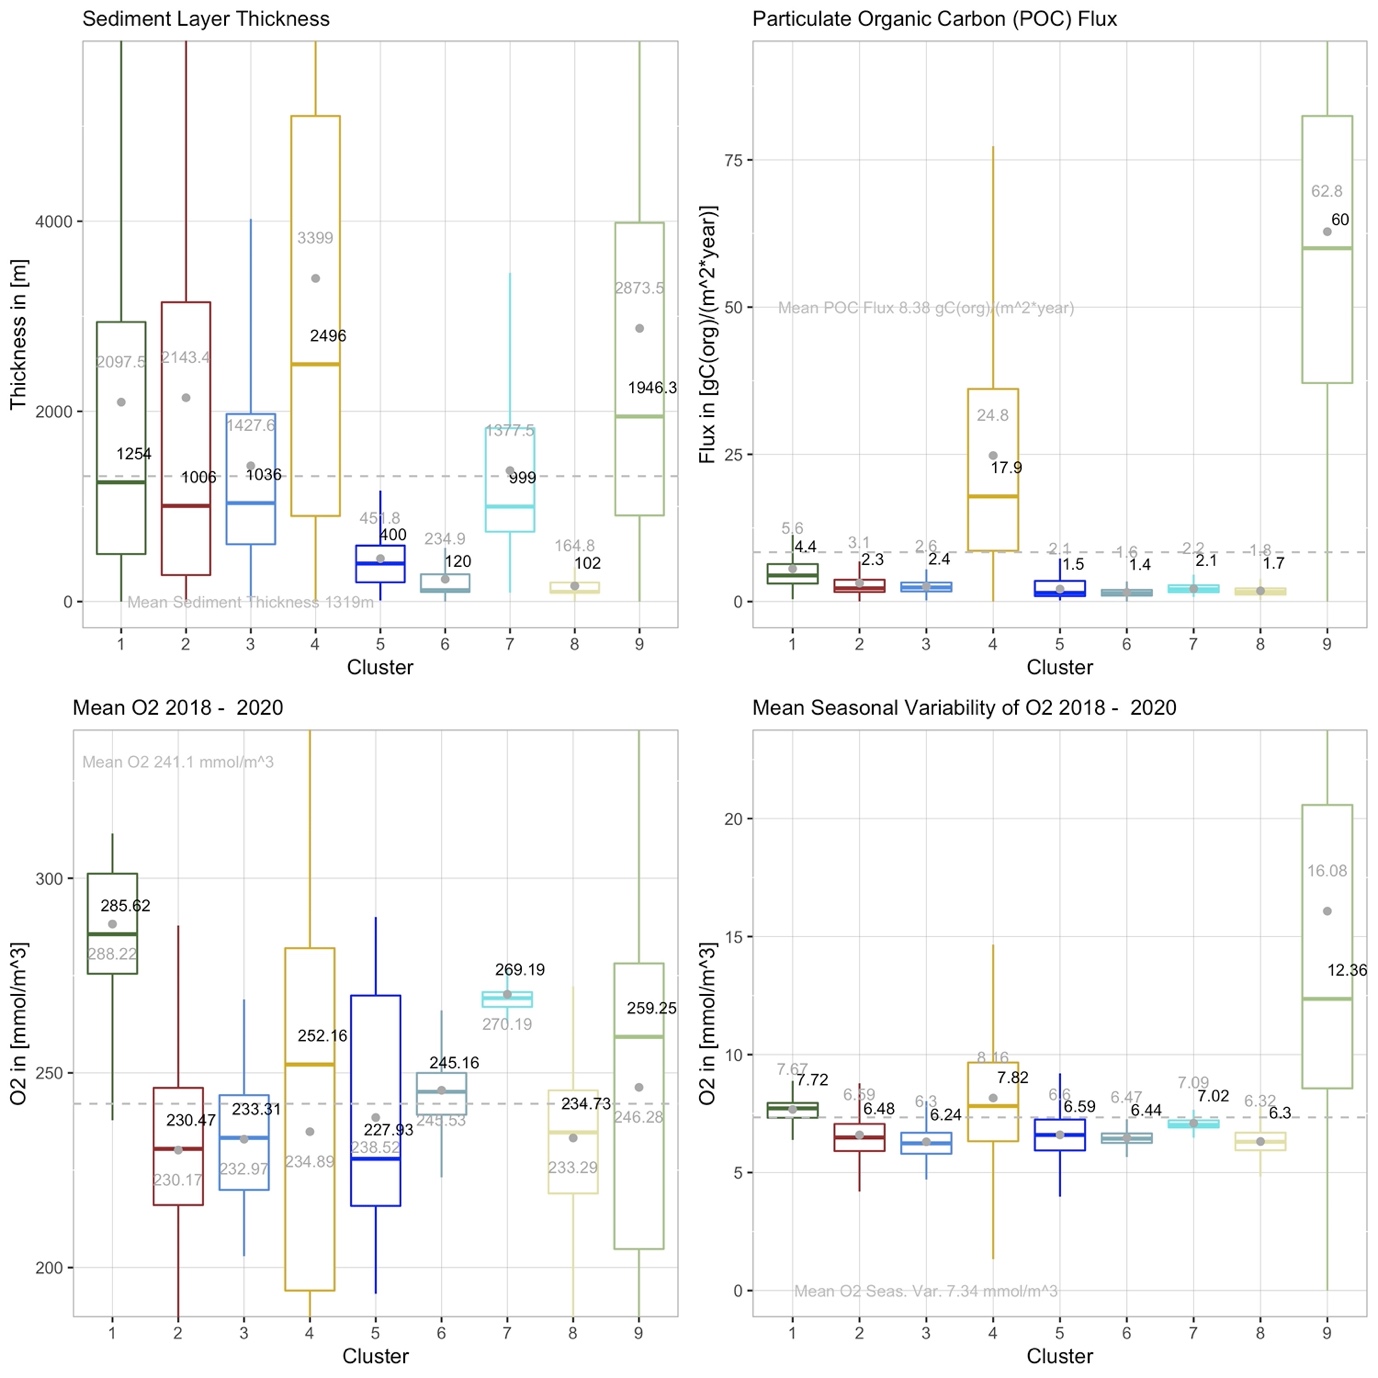

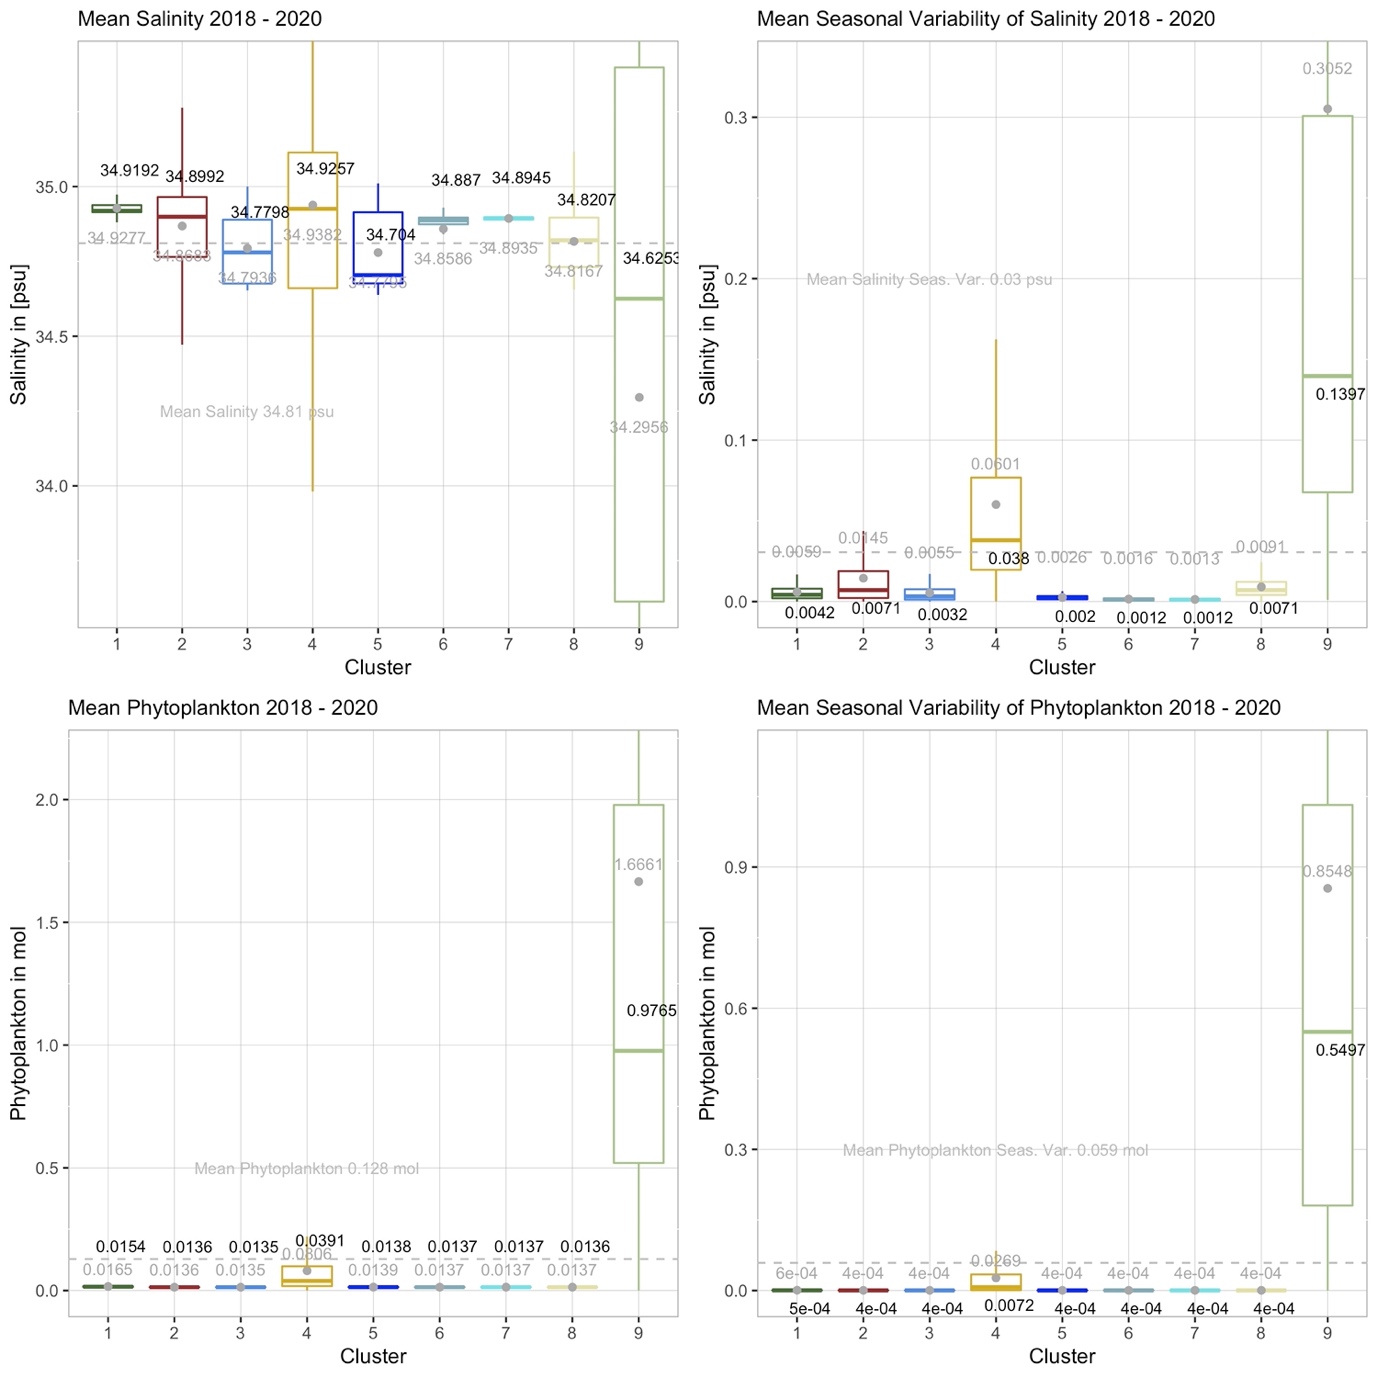


| **Figure F2: Boxplots outlining the SBA characteristics. The boxes comprise the groups’ interquartile ranges, i.e. between the upper (75%) and lower (25%) quartiles and contain the central 50% of the data. The ‘whiskers’ (straight lines below and above the box) denote minimum and maximum data values, and together with the boxes make up 95% of the data set. The remaining 5% are extreme values. The remaining 5% are extreme values, described by the coloured dots. The coloured lines/grey dots inside the boxes indicates the groups’ median/mean, whereas the straight dashed line is the overall data set’s median.**  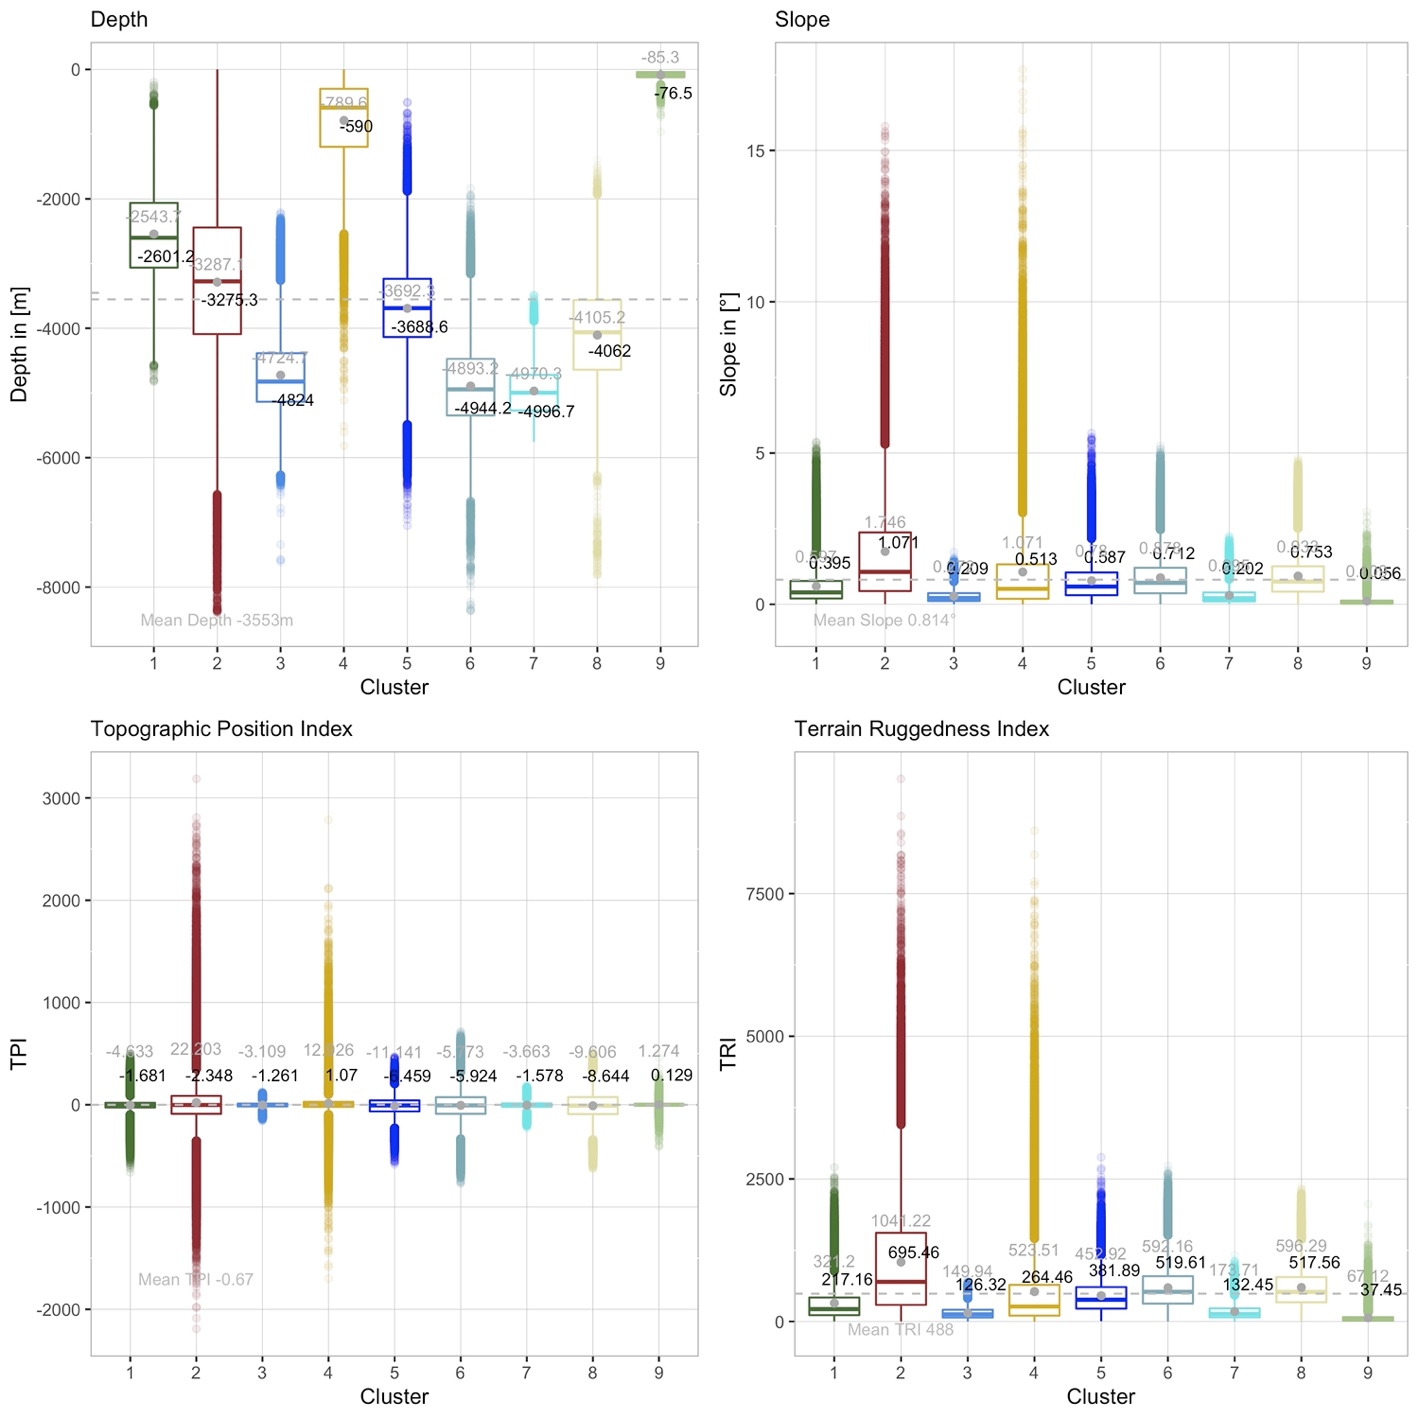 |
| --- |
| 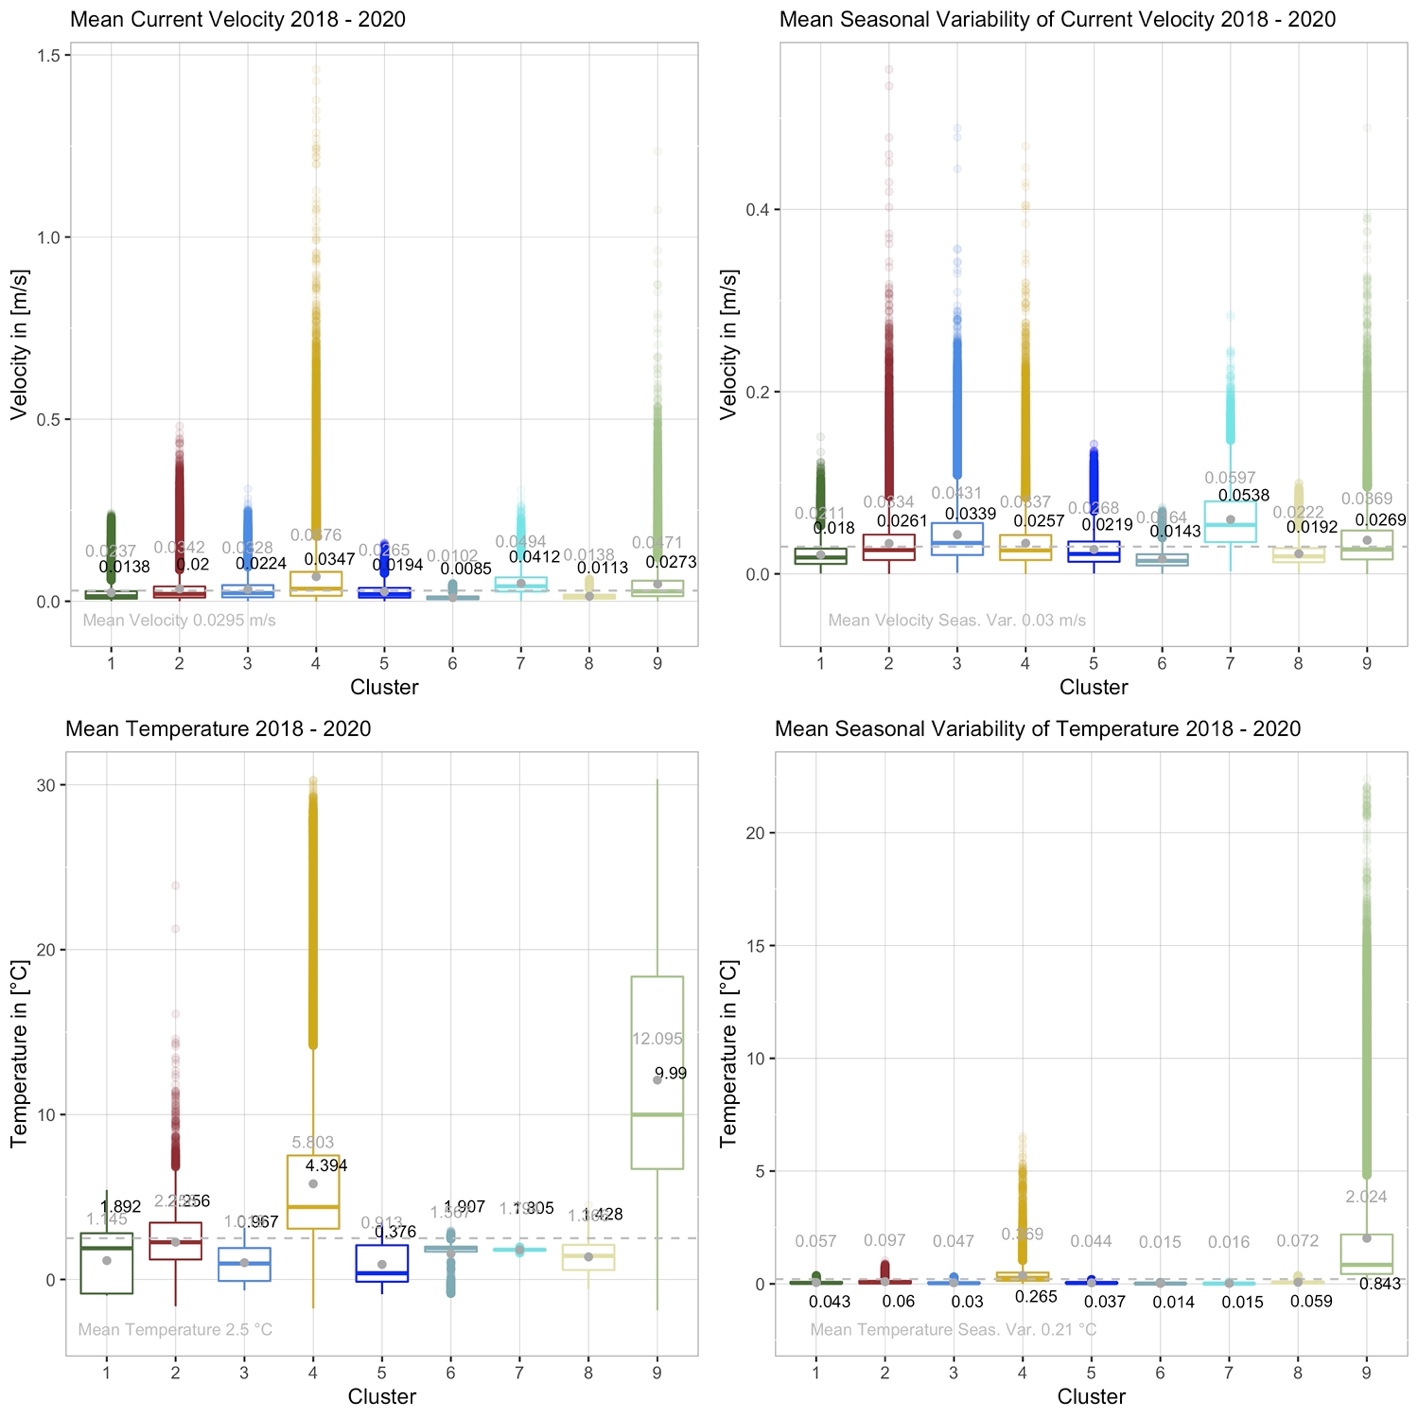  Figure 2 cont. |
| 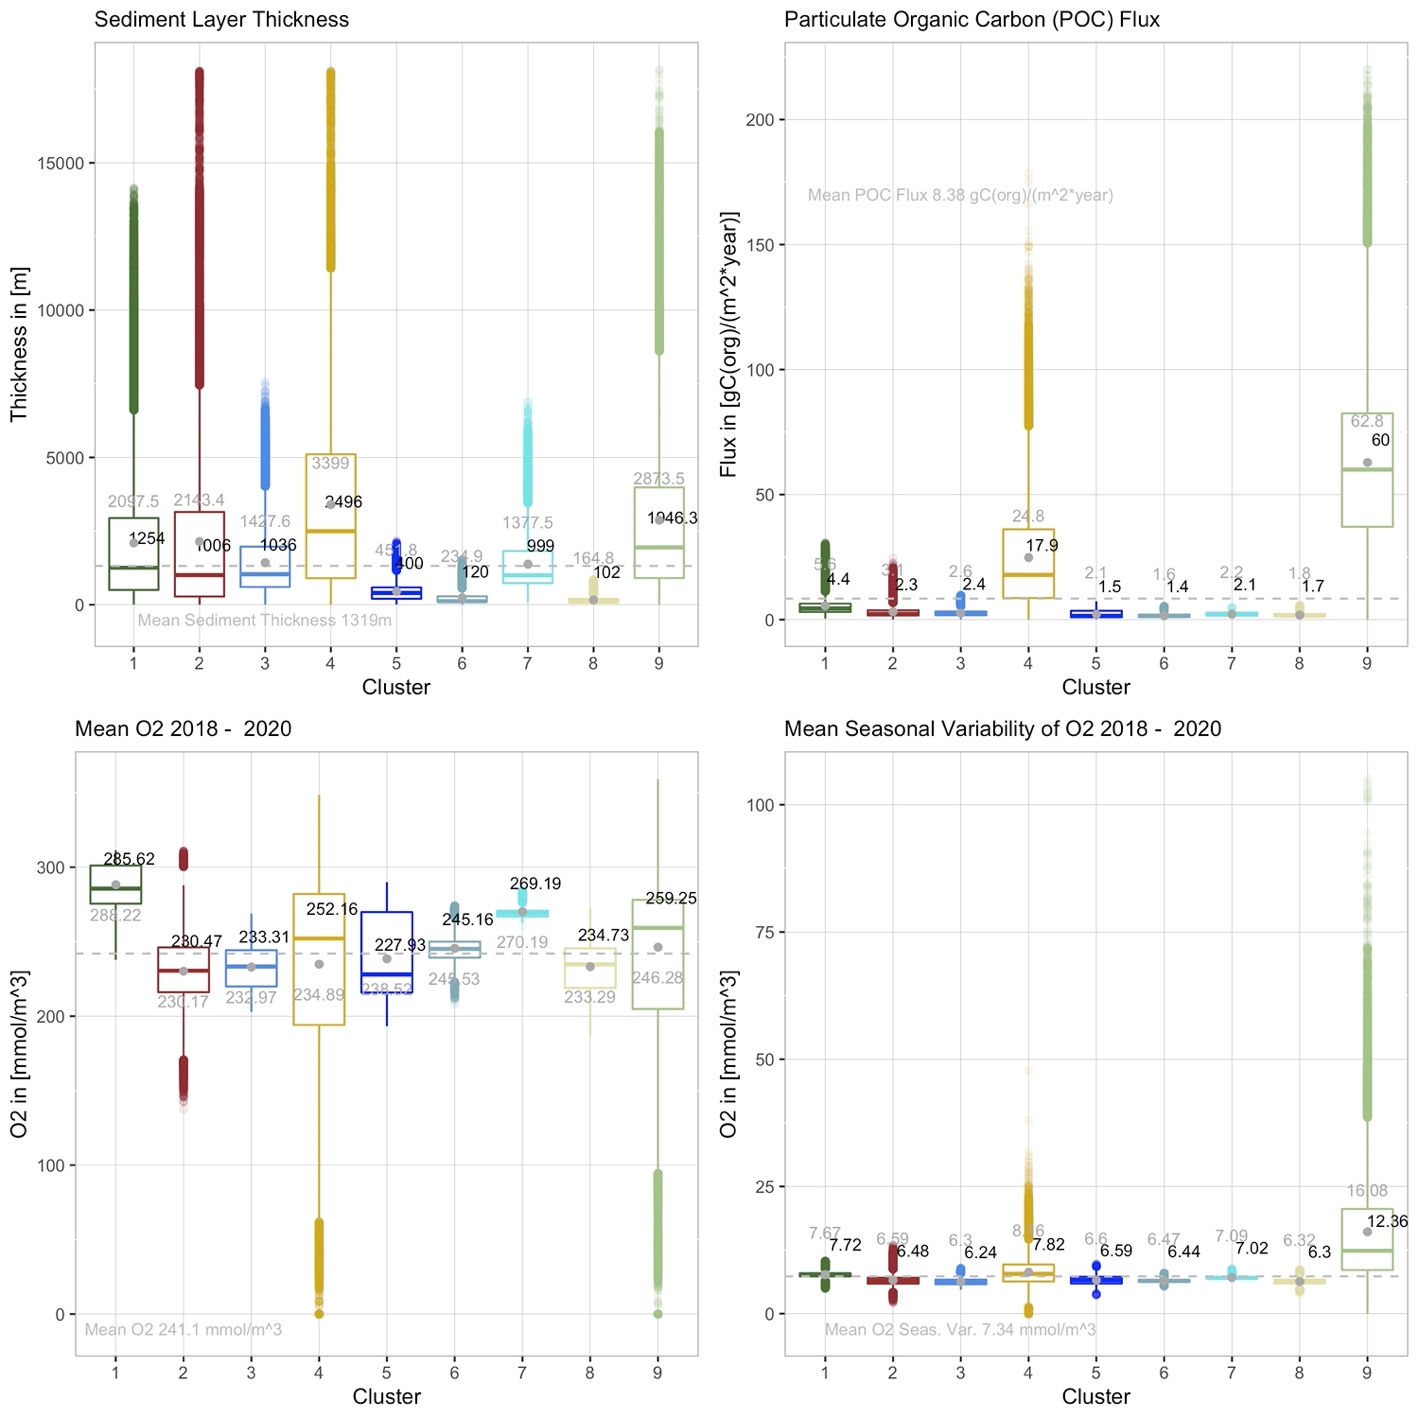  Figure 2 cont. |
| 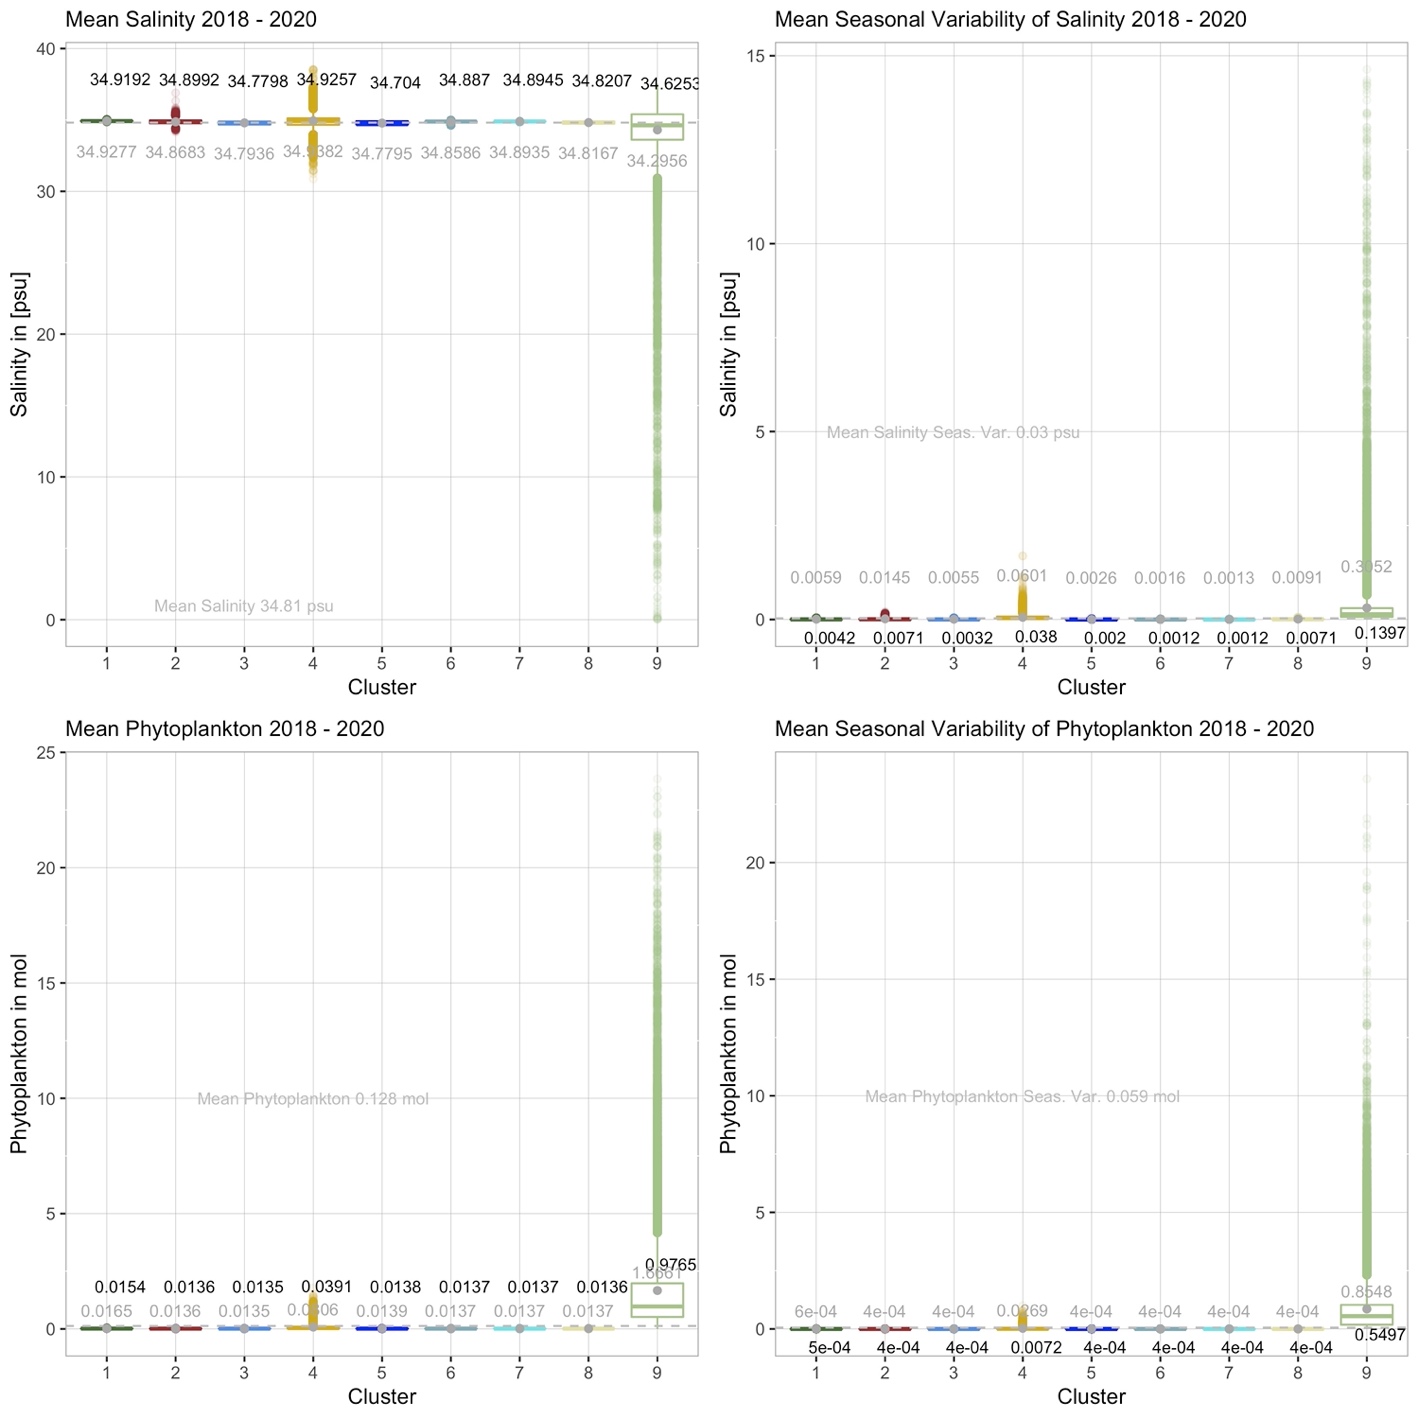 |

Figure 2 cont.

**T1: Detailed description of boxplots**

Depth.

SBA I: **shallow** median depth, moderate value span with maxima/minima at deeper/shallower water

SBA II: moderate median depth with **very wide value span** with maxima/minima at very deep/very shallow water

SBA III: **deep** median, **short value span**, a few slightly biased to shallow water

SBA IV: shallow median depth, moderate value span, some biased towards deeper water

SBA V: average median depth, moderate value span with maxima/minima at deeper/shallower water

SBA VI: **deep median**, moderate value span with a few biased towards shallower water

SBA VII: **deepest** **median**, short value span with maxima/minima at slightly deeper/shallower water

SBA VIII: deeper median, wide value span with few **biased towards** **extremely** deep water

SBA IX: **shallowest median** depth, **very short value span** and maxima/minima at deeper/shallower water

Slope.

SBA I: little median slope with moderate value span and some biased towards slopier terrain

SBA II: **highest median** slope, **extremely wide value span** with **biased towards extremely** slopy terrain

SBA III: small median slope, small value span with few **biased towards slightly slopier** terrain

SBA IV: little median slope, wide value span with biased towards **very slopy terrain**

SBA V: little median slope, moderate value span with **biased towards slopier** terrain

SBA VI: moderate median slope, moderate value span with **biased towards very slopy** terrain

SBA VII: small median slope, **short value span** with few biased towards slopier terrain

SBA VIII: average median slope, wide value span with **biased towards very slopy** terrain

SBA IX: **smallest median** slope, **very short value span** with not many extreme values

TPI.

SBA I: slightly negative median TPI, **wide value span** with some biased towards areas of negative TPI

SBA II: slightly negative median TPI with **extremely wide value span** and biased towards areas of **high positive TPI**

SBA III: slightly negative median TPI, moderate value span with few biased towards areas of negative TPI

SBA IV: **positive** TPI, wide value span with few biased towards areas of low positive TPI

SBA V: **high negative median** TPI with wide value span and biased towards areas of **high negative TPI**

SBA VI: **high negative median** TPI with **very wide value span** and not many extreme values

SBA VII: slightly negative median TPI, moderate value span with some biased towards areas of negative TPI

SBA VIII: **highest negative median** TPI with **very wide value span** and some biased towards areas of high negative TPI

SBA IX: **small positive/highest median** TPI with **very short value span** and few biased towards areas of higher positive TPI

*TRI (Riley, Shawn & Degloria, Stephen & Elliot, S.D. (1999). A Terrain Ruggedness Index that Quantifies Topographic Heterogeneity. Internation Journal of Science. 5. 23-27, p.24:*

- - - *0 - 80m: level*
    - *81 – 116m: nearly level*
    - *117 – 161m: slightly rugged*
    - *162 – 239m: intermediately rugged*
    - *240 – 497m: moderately rugged*
    - *498 – 958m: highly rugged*
    - *959 – 4367m: extremely rugged*

TRI.

SBA I: **low median TRI** with moderate value span and some biased towards slightly rougher terrain; intermediately rugged median with maxima to highly rugged terrain

SBA II: **highest median** TRI with **extremely wide value span** and **biased towards very rough** terrain; highly rugged median with maxima to extremely rugged terrain

SBA III: **very low median** TRI with **short value span** and few biased towards rougher terrain; slightly rugged median with maxima to moderately rugged terrain

SBA IV: low median TRI with wide value span and **biased towards very rough** terrain; moderately rugged median with maxima to extremely rugged terrain

SBA V: low median TRI with moderate value span and biased towards **rough terrain**; moderately rugged median with maxima to extremely rugged terrain

SBA VI: **high median** TRI with wide value span and some biased towards **very rough terrain**; highly rugged median with maxima to extremely rugged terrain

SBA VII: **very low median** TRI with **short value span** and some biased towards rougher terrain; slightly rugged median with maxima to moderately rugged terrain

SBA VIII: **high median** TRI with wide value span and some **biased towards very rough** terrain; highly rugged median with maxima to extremely rugged terrain;

SBA IX: **lowest median** TRI with **very short value range** and not many extreme values; level median with maxima under level terrain

Velocity.

SBA I: **very** **low median** current velocity with moderate value span and some biased towards higher current velocities

SBA II: low to moderate median current velocity with wide value span and some biased towards very high current velocities

SBA III: moderate median current velocity with wide value span and some biased towards **extremely high current velocities**

SBA IV: **high median** current velocity with extremely wide value span and **biased towards extremely high** current velocities

SBA V: low median current velocity with wide value span and some **bias towards higher** current velocities

SBA VI: **lowest median** current velocity with **short value span** and few biased towards slightly higher current velocities

SBA VII: **highest median** current velocity with wide value span and **biased towards very high** current velocities

SBA VIII: **very low median** current velocity with **short value span** and few biased towards moderate current velocities

SBA IX: average median current velocity with very wide value span and **biased towards extremely high** current velocities

Velocity Seasonal Change.

SBA I: **low median** current velocity seasonal change with moderate value span and few biased towards higher current velocity seasonal change

SBA II: moderate to average median current velocity seasonal change with wide value span and biased towards high current velocity seasonal change

SBA III: high median current velocity seasonal change with wide value span and biased towards very **high current velocity** seasonal change

SBA IV: moderate to average median current velocity seasonal change with wide value span and biased towards **high current velocity seasonal change**

SBA V: low median current velocity seasonal change with moderate value span and some biased towards **high current velocity seasonal change**

SBA VI: **lowest median** current velocity seasonal change with **short value span** and few biased towards moderate current velocity seasonal change

SBA VII: **highest median** current velocity seasonal change with **very wide value span** and some **biased towards very high** current velocity seasonal change

SBA VIII: **low median** current velocity seasonal change with **short value span** and few biased towards higher current velocity seasonal change

SBA IX: moderate to average median current velocity seasonal change with wide value span and **biased towards extremely high** current velocity seasonal change

Temperature.

SBA I: moderate to average median temperature with **wide value span** and **biased towards colder** temperatures

SBA II: average median temperature with moderate value span and not many extreme values

SBA III: cold median temperature with moderate value span and not many extreme values

SBA IV: **high** median temperature with wide value span and biased towards high temperatures

SBA V: **coldest** **median** temperature with wide value span and biased towards average temperatures

SBA VI: **cold** **to moderate median** temperature with **short value span** and few biased towards colder temperatures

SBA VII: **cold** **to moderate median** temperature with **very short value span** and not many extreme values

SBA VIII: **cold median** temperature with moderate value span and not many extreme values

SBA IX: **highest median** temperature with **extremely wide value span** and **biased towards very high** temperatures

Temperature Seasonal Change.

SBA I: little median temperature seasonal change with moderate value span and little biased towards higher temperature seasonal change

SBA II: little to moderate median temperature seasonal change with moderate value span and some biased towards higher temperature seasonal change

SBA III: little median temperature seasonal change with moderate value span and few biased towards higher temperature seasonal change

SBA IV: **high** **median** temperature seasonal change with wide value span and some biased towards **high temperature seasonal change**

SBA V: **little median** temperature seasonal change with moderate value span and few biased towards higher temperature seasonal change

SBA VI: **very little median** temperature seasonal change with **short value span** and not many extreme values

SBA VII: **very little median** temperature seasonal change with **short value span** and not many extreme values

SBA VIII: **little median** temperature seasonal change with moderate value span and few biased towards higher temperature seasonal change

SBA IX: **highest median** temperature seasonal change with **extremely wide value span** and **biased towards very high** temperature seasonal change

Sediment Thickness.

SBA I: average median sediment cover with wide value span **and biased towards extremely thick** sediment layers

SBA II: moderate median sediment cover with wide value span and biased towards **extremely thick sediment** layers

SBA III: moderate median sediment cover with moderate value span and some biased towards thicker sediment layers

SBA IV: **highest median** sediment cover with extremely wide value span and biased towards **extremely thick sediment layers**

SBA V: **low median** sediment cover with **short value span** and few biased towards slightly thicker sediment layers

SBA VI: **lowest median** sediment cover with **short value span** and few biased towards slightly thicker sediment layers

SBA VII: moderate median sediment cover with moderate value span and some biased towards thicker sediment layers

SBA VIII: **very low median** sediment cover with very short value span and not many extreme values

SBA IX: **high median** sediment cover with **very wide value span** and **biased towards extremely thick** sediment layers

POC.

SBA I: low median POC flux with **short value span** and little biased towards slightly enhanced POC fluxes

SBA II: low median POC flux with short value span and few biased towards slightly enhanced POC fluxes

SBA III: low median POC flux with short value span and not many extreme values

SBA IV**: high median** POC flux with wide value span and biased towards **very high POC fluxes**

SBA V: **very low** POC flux with short value span and few biased towards slightly enhanced POC fluxes

SBA VI: **lowest median** POC flux with very short value span and not many extreme values

SBA VII: low median POC flux with short value span and not many extreme values

SBA VIII: **very low median** POC flux with **very short value span** and not many extreme values

SBA IX: **highest median** POC flux with **extremely wide value span** and **biased towards extremely** high POC fluxes

O2.

SBA I: **highest median** oxygen concentration with moderate value span, little biased towards higher oxygen and minimum at low oxygen concentrations

SBA II: **low median** oxygen with moderate value span and few biased towards higher and lower oxygen concentrations

SBA III: **low median** oxygen concentration with moderate value span and not many extreme values

SBA IV**: high median** oxygen concentration with extremely wide value span, biased towards **very low oxygen concentrations and very high maximum**

SBA V: **lowest median** oxygen concentrations with wide value span and some **biased towards higher oxygen concentrations**

SBA VI: **average to high** median oxygen concentration with **short value span** and not many extreme values

SBA VII: **very high median** oxygen concentration with **very short value span** and not many extreme values

SBA VIII: **low median** oxygen concentration with wide value span and few biased towards very low oxygen concentrations

SBA IX: **high median** oxygen concentration with **extremely wide value span**, **biased towards very low** oxygen concentrations and **very high maximum**

O2 Seasonal Change.

SBA I: average to higher median oxygen seasonal change with moderate value span and not many extreme values

SBA II: little median oxygen seasonal change with moderate value span and not many extreme values

SBA III: **lowest median** oxygen seasonal change with moderate value span and not many extreme values

SBA IV: average to high median oxygen seasonal change with few biased towards higher oxygen seasonal changes

SBA V: **little median** oxygen seasonal change with **short value span** and not many extreme values

SBA VI: **little median** oxygen seasonal change with **very short value span** and not many extreme values

SBA VII: average median oxygen seasonal change with **very short value span** and not many extreme values

SBA VIII: **very little median** oxygen seasonal change with moderate value span and not many extreme values

SBA IX: **highest median** oxygen seasonal change with **extremely wide value span** and **biased towards extremely high** oxygen seasonal changes

Salinity.

SBA I: **high median** salinity with **very short value span** and not many extreme values

SBA II: **high median** salinity with moderate value span and little biased towards lower salinity

SBA III: **low median** salinity with moderate value span and few biased towards higher salinity

SBA IV: **highest median** salinity with wide value span and few biased towards very high salinity

SBA V: **lowest median** salinity with wide value span and some biased towards higher salinity

SBA VI: **high median** salinity with **short value span** and not many extreme values

SBA VII: **high salinity** with **very short value span** and not many extreme values

SBA VIII: average median salinity with moderate value span and not many extreme values

SBA IX: **lowest median** salinity with **extremely wide value span** and **biased towards extremely low** salinity

Salinity Seasonal Change.

SBA I: low median salinity seasonal change with short value span and **maximum at slightly enhanced** salinity seasonal change

SBA II: low median salinity seasonal change with moderate value span and **maxima at high** salinity seasonal change

SBA III: low median salinity seasonal change with short value span and maximum at slightly enhanced salinity seasonal change

SBA IV: **high median** salinity seasonal change with wide value span and maxima to very high salinity seasonal change

SBA V: **very low median** salinity seasonal change with very short value span and no evident maxima/minima

SBA VI: **very low median** salinity seasonal change with very short value span and no evident maxima/minima

SBA VII: **very low median** salinity seasonal change with very short value span and no evident maxima/minima

SBA VIII: low median salinity seasonal with short value span and maxima at slightly enhanced salinity seasonal change

SBAI IX: **highest median** salinity seasonal change with **extremely wide value span** and **biased towards extremely high** salinity seasonal change

Phytoplankton.

SBA I: very low median phytoplankton with very short value span and not many extreme values

SBA II: very low median phytoplankton with very short value span and not many extreme values

SBA III: very low median phytoplankton with very short value span and not many extreme values

SBA IV: **low** phytoplankton with moderate value span and some biased towards **higher phytoplankton concentrations**

SBA V: very low median phytoplankton with very short value span and not many extreme values

SBA VI: very low median phytoplankton with very short value span and not many extreme values

SBA VII: very low median phytoplankton with very short value span and not many extreme values

SBA VIII: very low median phytoplankton with very short value span and not many extreme values

SBA IX: **highest median** phytoplankton with extremely wide value span and biased towards **extremely high phytoplankton** concentrations

Phytoplankton Seasonal Change.

SBA: very low median phytoplankton seasonal change with short value span and not many extreme values

SBA II: very low median phytoplankton seasonal change with short value span and not many extreme values

SBA III: very low median phytoplankton seasonal change with short value span and not many extreme values

SBA VI: **low** median phytoplankton seasonal change with moderate value span and some biased towards **higher phytoplankton seasonal change**

SBA V: very low median phytoplankton seasonal change with short value span and not many extreme values

SBA VI: very low median phytoplankton seasonal change with short value span and not many extreme values

SBA VII: very low median phytoplankton seasonal change with short value span and not many extreme values

SBA VIII: very low median phytoplankton seasonal change with short value span and not many extreme values

SBA IX: **highest median** phytoplankton seasonal change with **extremely wide value span** and biased towards **extremely high phytoplankton seasonal change**
